# Supplementary material
Source: publisher figshare collection journal article supplement (https://tandf.figshare.com/ndownloader/files/14514686)
Supplement: Supplementary file 1 [file 14514686]

## Sheet: Table1
Stratigraphy	Abu Roash A Member
	lower Campanian				Santonian											upper Coniacian
SOM/ Sample Nomber	1570	1576	1582	1588	1594	1600	1606	1612	1618	1624	1630	1636	1642	1648	1654	1660	1666	1672	1678	1684	1690	1696	1702	1708	1714	1720	1726	1732	1738	1744	1750
Small-size Equidimensional	18	13	20	12	10	12	26	32	14	15	4	7	22	17	10	29	17	5	21	23	7	14	17	22	8	23	14	8	62	28	7
Large-size Lath	11	5	29	0	1	6	13	9	12	10	1	3	4	3	13	6	12	5	6	2	2	3	4	11	13	4	8	9	4	12	3
Total Opaque	29	18	49	12	11	18	39	41	26	25	5	10	26	20	23	35	29	10	27	25	9	17	21	33	21	27	22	17	66	40	10
Wood tracheids	36	4	142	136	152	129	95	65	69	72	94	42	104	139	74	50	52	9	11	19	11	22	90	35	51	48	50	23	23	168	61
Cuticle	3	2	11	19	25	16	27	9	16	11	2	4	7	12	17	4	5	0	5	3	3	6	19	6	18	5	8	9	5	5	4
Membranes	0	0	4	8	6	8	9	4	1	1	5	2	5	13	6	3	4	0	0	0	2	1	8	5	6	5	5	3	1	2	2
Fungal hyphae	1	0	4	5	3	10	13	4	1	2	4	4	2	7	5	8	2	0	8	2	1	3	4	3	2	4	1	3	4	8	2
Total Translucent	40	6	161	168	186	163	144	82	87	86	105	52	118	171	102	65	63	9	24	24	17	32	121	49	77	62	64	38	33	183	69
Total Phytocalst content	69	24	210	180	197	181	183	123	113	111	110	62	144	191	125	100	92	19	51	49	26	49	142	82	98	89	86	55	99	223	79
Total AOM	231	276	90	120	103	119	117	177	187	189	190	238	156	110	175	200	209	281	255	255	274	251	158	218	202	211	214	245	201	77	221
Acritarch	7	6	9	3	1	2	4	3	9	10	3	4	7	4	8	5	16	11	13	9	5	2	7	4	2	0	9	2	3	4	0
Dinocysts	96	124	134	91	102	142	108	119	114	145	141	151	117	151	93	108	97	141	123	132	80	123	121	146	140	131	122	126	131	102	19
Foraminifera test Linning	60	52	30	77	69	63	62	77	65	50	73	68	71	57	47	96	26	64	48	51	31	71	50	32	50	59	64	69	57	86	46
Fresh Water Algea	9	2	5	47	39	3	5	0	4	3	4	1	10	3	35	3	52	5	4	1	3	1	8	8	19	11	8	6	4	3	2
Pollen grains	20	11	23	14	9	4	22	10	9	6	4	1	6	1	14	4	11	7	12	7	3	6	17	9	1	2	3	2	4	5	0
Spores	5	4	7	3	0	1	4	3	5	1	0	1	0	0	6	0	5	2	2	2	2	0	5	3	0	0	0	1	1	0	0
Prasinophyte	7	2	7	1	0	1	0	2	2	2	1	0	2	1	4	1	0	2	0	2	0	0	0	1	0	0	0	0	1	0	0
Palynomorphs	204	201	215	236	220	216	205	214	208	217	226	226	213	217	207	217	207	232	202	204	124	203	208	203	212	203	206	206	201	200	67
Total	504	501	515	536	520	516	505	514	508	517	526	526	513	518	507	517	508	532	508	508	424	503	508	503	512	503	506	506	501	500	367
